# Supplementary material
Source: publisher figshare collection journal article supplement (https://frontiersin.figshare.com/ndownloader/files/14364938)
Supplement: Supplementary file [file 14364938]

Table S1. Demographics of women enrolled in study.

| Parameter               | Premenopausal<br>(N=15) | Postmenopausal<br>(N=15) | Postmenopausal + HT<br>(N=15) |
|-------------------------|-------------------------|--------------------------|-------------------------------|
| Age (years)             | 33.0 ± 6.4 <sup>a</sup> | 60.7 ± 3.6               | 60.5 ± 3.6                    |
| Height (inches)         | 64.7 ± 3.7              | 63.5 ± 2.8               | 63.9 ± 2.5                    |
| Weight (lbs)            | 156 ± 22.8              | 149.2 ± 27               | 147.8 ± 23.7                  |
| BMI                     | 26.2 ± 3.3              | 25.9 ± 3.6               | 25.5 ± 4.3                    |
| Years since last period | NA                      | 15.8 ± 9.3               | 14.2 ± 8.2                    |
| Average time on HT      | NA                      | NA                       | 5y, 2 mo                      |
| Ethnicity               |                         |                          |                               |
| African-American        | 6 (40%)                 | 2 (13%)                  | 0 (0%)                        |
| Caucasian               | 8 (53%)                 | 13 (87%)                 | 15 (100%)                     |
| Other                   | 1 (7%)                  | 0 (0%)                   | 0 (0%)                        |

<sup>a</sup> mean ± standard deviation

HT indicates hormone therapy
